# Supplementary material for: Development of an airway mucus defect in the cystic fibrosis rat
Source: JCI journal article supplement (doi:10.1172/jci.insight.97199), 2018-01-10
Supplement: sd1 [file 1]

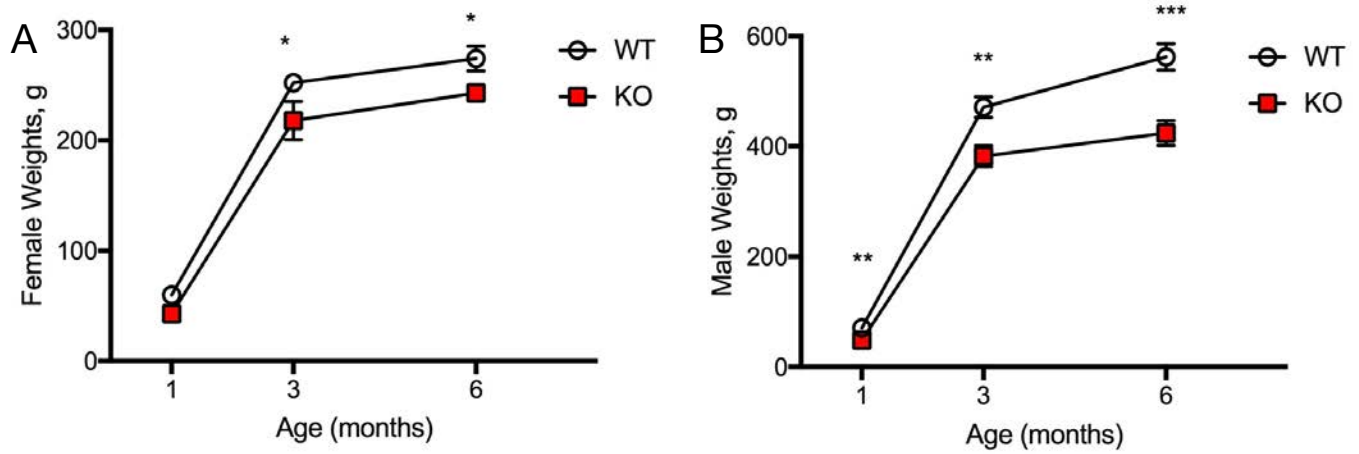

**Supplemental Figure 1. Weights of CFTR-KO rats compared to WT littermates.** Weights at 1, 3, and 6 months of WT and KO females (A) and males (B). \* $p < 0.05$ , \*\* $p < 0.01$ , \*\*\* $p < 0.001$ ; A-B is from 6 animals/group.

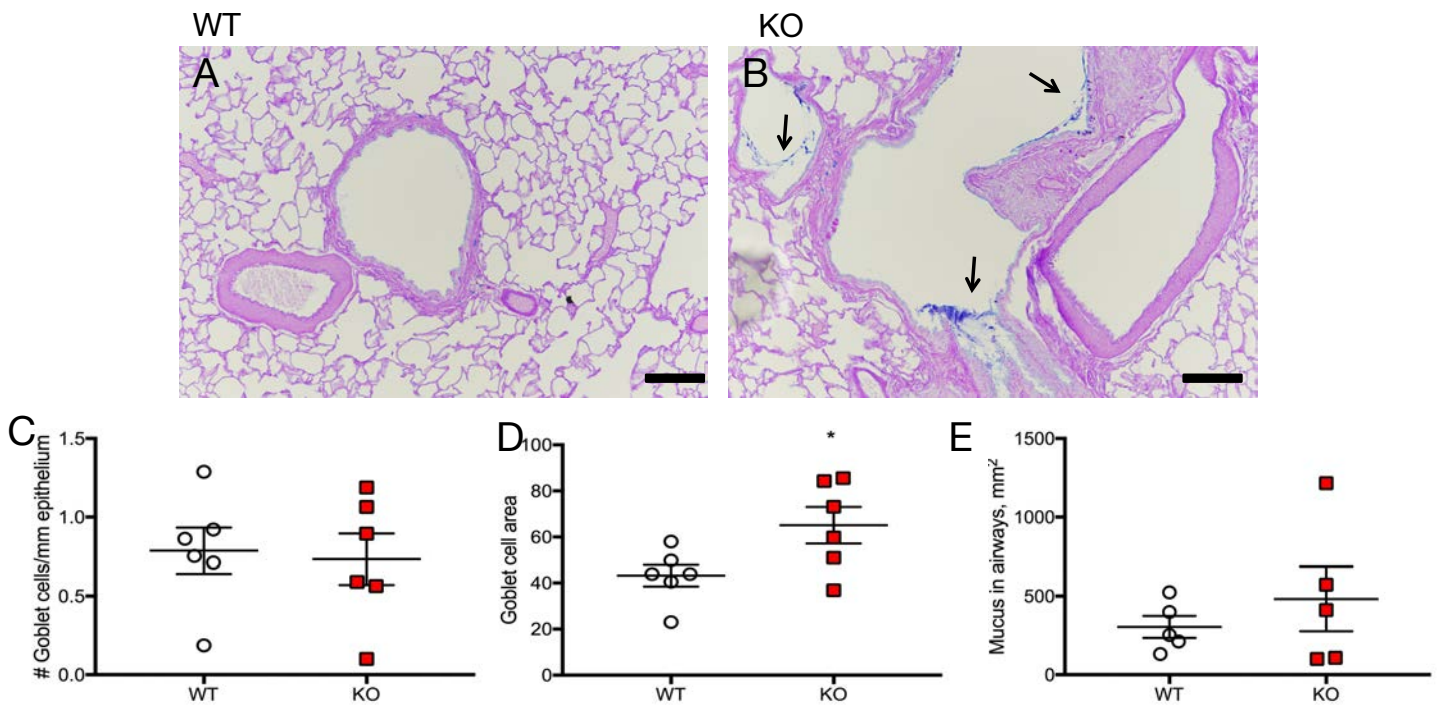

**Supplemental Figure 2. Presence of mucus in small airways in the 6-month old CFTR-KO rat.** Representative lung histology from WT (A) and KO (B) rats at 6 months of age show increased mucus in the small airways of the KO (black arrows). Quantification of number of goblet cells in the small airways (C) and size of goblet cells in the small airways (D), as well as quantification of mucus accumulation in the airways. \* $p < 0.05$ ; A-B are representatives of three independent studies. C-E is from 6 animals/group.
